## Inhibitory Effects of Diazepam and Midazolam on $\text{Ca}^{2+}$ and $\text{K}^{+}$ Channels in Canine Tracheal Smooth Muscle Cells

Michiaki Yamakage, M.D., Ph.D.,\* Takashi Matsuzaki, M.D., Ph.D.,† Naoki Tsujiguchi, M.D.,† Yasuyuki Honma, M.D.,† Akiyoshi Namiki, M.D., Ph.D.‡

**Background:** Benzodiazepines have a direct bronchodilator action in airway smooth muscle, but the mechanisms by which these agents produce muscle relaxation are not fully understood. The current study was performed to identify the effects of the benzodiazepines diazepam and midazolam on  $\text{Ca}^{2+}$  and  $\text{K}^{+}$  channels in canine tracheal smooth muscle cells.

**Methods:** Whole-cell patch-clamp recording techniques were used to evaluate the effects of the benzodiazepines diazepam ( $10^{-8}$  to  $10^{-3}$  M) and midazolam ( $10^{-8}$  to  $10^{-3}$  M) on inward  $\text{Ca}^{2+}$  and outward  $\text{K}^{+}$  channel currents in dispersed canine tracheal smooth muscle cells. The effects of the antagonists flumazenil ( $10^{-5}$  M) and PK11195 ( $10^{-5}$  M) on these channels were also studied.

**Results:** Each benzodiazepine tested significantly inhibited  $\text{Ca}^{2+}$  currents in a dose-dependent manner, with  $10^{-6}$  M diazepam and  $10^{-5}$  M midazolam each causing approximately 50% depression of peak voltage-dependent  $\text{Ca}^{2+}$  currents. Both benzodiazepines promoted the inactivated state of the channel at more-negative potentials. The  $\text{Ca}^{2+}$ -activated and voltage-dependent  $\text{K}^{+}$  currents were inhibited by diazepam and midazolam ( $> 10^{-5}$  M and  $> 10^{-4}$  M, respectively). Flumazenil and PK11195 had no effect on these channel currents or on the inhibitory effects of the benzodiazepines.

**Conclusions:** Diazepam and midazolam had inhibitory effects on voltage-dependent  $\text{Ca}^{2+}$  channels, which lead to muscle re-

laxation. However, high concentrations of these agents were necessary to inhibit the  $\text{K}^{+}$  channels. The lack of antagonized effects of their antagonists is related to the non- $\gamma$ -aminobutyric acid-mediated electrophysiologic effects of benzodiazepines on airway smooth muscle contractility. (Key words:  $\text{Ca}^{2+}$ -activated  $\text{K}^{+}$  channel; flumazenil; PK11195; voltage-dependent delayed rectifier  $\text{K}^{+}$  channel.)

BENZODIAZEPINES, especially midazolam, have been used widely for sedation and to induce general anesthesia. In addition to their hypnotic action, these agents have a direct relaxing effect on airway smooth muscle<sup>1,2</sup> and vascular smooth muscle.<sup>3,4</sup> Because the intracellular concentration of free  $\text{Ca}^{2+}$  ( $[\text{Ca}^{2+}]_i$ ) plays a central role in the regulation of airway smooth muscle tone,<sup>5,6</sup> a possible mechanism for the relaxation produced by benzodiazepines is a decrease in  $[\text{Ca}^{2+}]_i$ . Yoshimura *et al.*<sup>7</sup> used the  $\text{Ca}^{2+}$  indicator fura-2 to show that relaxation of contracted porcine tracheal smooth muscle by midazolam at clinically relevant concentrations was associated with a decrease in  $[\text{Ca}^{2+}]_i$ . Sustained contraction of airway smooth muscle requires the continued entry of extracellular  $\text{Ca}^{2+}$ ,<sup>8</sup> and the blockade of voltage-dependent  $\text{Ca}^{2+}$  channels (VDCCs) suppresses the sustained increase in  $[\text{Ca}^{2+}]_i$  in agonist-stimulated tracheal smooth muscle.<sup>9</sup> We hypothesized, therefore, that benzodiazepines reduce  $[\text{Ca}^{2+}]_i$  by inhibiting VDCC.

Conversely, the open-state probability of VDCC depends on the plasma membrane potential, which is regulated by  $\text{K}^{+}$ -selective channels.<sup>10,11</sup> One other potential mechanism for bronchodilation by benzodiazepines is enhanced  $\text{K}^{+}$  conductance, leading to a decrease in VDCC opening and thus to muscle relaxation.<sup>12</sup>

In the current study, we used whole-cell patch-clamp techniques to identify the direct effects of the benzodiazepines diazepam and midazolam on  $\text{Ca}^{2+}$  and  $\text{K}^{+}$  channels in freshly dispersed canine tracheal smooth muscle cells. We also evaluated the antagonized effects of the benzodiazepine antagonists flumazenil and PK11195

\* Instructor in Anesthesiology.

† Fellow in Anesthesiology.

‡ Professor and Chair, Department of Anesthesiology.

Received from the Department of Anesthesiology, Sapporo Medical University School of Medicine, Sapporo, Japan. Submitted for publication May 13, 1998. Accepted for publication September 2, 1998. Supported in part by a grant-in-aid (10770762) for research from the Ministry of Education, Science and Culture, Tokyo, Japan. Presented in part at the annual meeting of the American Society of Anesthesiologists, October 18-22, 1997, San Diego, California.

Address reprint requests to Dr. Yamakage: Department of Anesthesiology, Sapporo Medical University School of Medicine, South-1, West-16, Chuo-ku, Sapporo 060-8543, Japan. Address electronic mail to: yamakage@sapmed.ac.jp

§ Ducros L, Plaisance P, Joseph T, Bard M, Salmeron S, Payen D, Lecarpentier Y: Determinants of ketamine-induced bronchodilation in guinea pig tracheal smooth muscle (abstract). *Am J Respir Crit Care Med* 1996; 153:A741



(specific central-type and specific peripheral-type antagonists, respectively) on the  $\text{Ca}^{2+}$  and  $\text{K}^{+}$  channels.

## Materials and Methods

### *Preparation of Dispersed Canine Tracheal Smooth Muscle Cells*

The Sapporo Medical University Ethical Committee on Animal Research approved the study. Adult mongrel dogs weighing 9–12 kg were anesthetized with 10 mg/kg intramuscular ketamine and killed by exsanguination. The tracheas were excised quickly and placed in modified Krebs' solution equilibrated with 95% oxygen and carbon dioxide at 4°C (composed of 118 mM NaCl, 4.7 mM KCl, 21 mM  $\text{NaHCO}_3$ , 1.2 mM  $\text{MgSO}_4$ , 1.2 mM  $\text{KH}_2\text{PO}_4$ , 10 mM glucose, and 2.5 mM  $\text{CaCl}_2$ ; pH ~7.4). Cells were dispersed according to previously described methods.<sup>13,14</sup> Briefly, tracheal smooth muscle was minced and incubated for 10 min in  $\text{Ca}^{2+}$ -free modified Tyrode's solution at room temperature (22–24°C). The modified Tyrode's solution contained 135 mM NaCl, 5.4 mM KCl, 1 mM  $\text{MgCl}_2$ , 5 mM glucose, 5 mM N-[2-hydroxyethyl]piperazine-N'-[2-ethanesulfonic acid] (HEPES), and 0.1% (wt/vol) bovine serum albumin, with the pH adjusted to 7.4 with 0.5 M tris-[hydroxymethyl]aminomethane (Tris). The tissue was digested for 20 min at 37°C in  $\text{Ca}^{2+}$ -free modified Tyrode's solution that contained 0.08% (wt/vol) collagenase, 0.05% trypsin inhibitor, and 0.03% protease. Cells were dispersed by trituration, filtered through nylon mesh, and centrifuged. The pellet was resuspended in a modified Kraftbrühe solution<sup>15</sup> and stored at 4°C for as long as 5 h before being used. The modified Kraftbrühe solution contained 85 mM KCl, 30 mM  $\text{K}_2\text{HPO}_4$ , 5 mM  $\text{MgSO}_4$ , 5 mM  $\text{Na}_2\text{ATP}$ , 5 mM pyruvic acid, 5 mM creatine, 20 mM taurine, 5 mM  $\beta$ -hydroxybutyrate, and 0.1% (wt/vol) fatty acid-free bovine serum albumin, with the pH adjusted to 7.25 with Tris.

### *Whole-cell Patch-clamp Recording*

All experiments were performed at room temperature (22–24°C). Micropipettes were pulled from soda lime hematocrit tubing (GC-1.5; Narishige, Tokyo, Japan) using a two-stage puller (model PP-83, Narishige) and were heat polished. These had resistances of 3 to 5 M $\Omega$  when filled with solution. An aliquot (approximately 0.5 ml) of the cell suspension was placed in a perfusion chamber on the stage of an inverted microscope (IX-70; Olympus, Tokyo, Japan). At  $\times 600$  magnification, a three-dimensional oil-driven micromanipulator (ONM-1; Narishige)

was used to position the patch pipettes against the membrane of the tracheal smooth muscle cells. After obtaining a high-resistance seal (5–50 G $\Omega$ ) with slight suction (5–20 cm water), the patch membrane was disrupted by strong negative pressure, which allowed the voltage of the entire cell membrane to be controlled<sup>16</sup> and permitted the pipette solution to diffuse into the cytoplasm. Membrane currents were monitored using a CEZ-2400 patch-clamp amplifier (Nihon Kohden, Tokyo, Japan), and the amplifier output was low-pass filtered at 2,000 Hz. Leak currents, estimated by appropriate scaling of currents during 20-mV hyperpolarizing pulses, were subtracted from each of these records. Membrane capacitance and series resistance were compensated for by using the internal circuitry of the patch-clamp amplifier. All data were digitized (10,000 samples per s), stored on a hard disk, and analyzed using a 8100/100AV Power Macintosh computer (Apple, Cupertino, CA) using the Pulse+PulseFit 8.02 and Igor Pro 2.04 analysis software programs (Heka, Wiesenstrasse, Lambrecht, Germany).

To measure inward  $\text{Ca}^{2+}$  currents ( $I_{\text{Ca}}$ ) through VDCCs, recording solutions were chosen to inhibit  $\text{K}^{+}$  currents and enhance  $\text{Ca}^{2+}$  currents. The pipette solution contained 130 mM CsCl, 4 mM  $\text{MgCl}_2$ , 10 mM EGTA, 5 mM  $\text{Na}_2\text{ATP}$ , and 10 mM HEPES, with the pH adjusted to 7.2 with Tris. The bath solution contained 130 mM tetraethylammonium chloride, 1 mM  $\text{MgCl}_2$ , 10 mM  $\text{CaCl}_2$ , 10 mM glucose, and 10 mM HEPES, with the pH adjusted to 7.4 with Tris. Whole-cell  $I_{\text{Ca}}$ s were elicited at 5-s intervals by 150-ms depolarizing pulses (–50 to +40 mV in 10-mV increments) from a holding potential of –70 mV. Inactivation curves were determined using a double-pulse protocol that consisted of a 3-s prepulse to a potential of –70 to +20 mV, followed by a 150-ms depolarization to +20 mV. The peak change in the current during the test pulse was expressed as a fraction of that obtained with the –70-mV prepulse, and this quantity was fit to a Boltzmann expression<sup>17,18</sup> using least-squares analysis to estimate the potential of half-maximal inactivation ( $V_{1/2}$ ) and the slope factor ( $k$ ).

To measure outward  $\text{K}^{+}$  currents ( $I_{\text{K}}$ ), recording solutions were chosen to enhance the  $\text{K}^{+}$  currents. The pipette solution contained 70 mM KCl, 60 mM  $\text{K}^{+}$ -glutamate, 5 mM  $\text{K}_2\text{ATP}$ , 1 mM  $\text{MgCl}_2$ , 2.5 mM EGTA, 1.8 mM  $\text{CaCl}_2$ , and 10 mM HEPES, with the pH adjusted to 7.2 with Tris; the computer-calculated  $[\text{Ca}^{2+}]_i$  was  $\sim 10^{-6}$  M. A variant of this solution contained 10 mM EGTA and no  $\text{CaCl}_2$ , giving a  $[\text{Ca}^{2+}]_i$  of  $\leq 10^{-9}$  M. The bath solution contained 135 mM NaCl, 5.2 mM KCl, 1.8 mM  $\text{CaCl}_2$ , 1 mM



EFFECTS OF BENZODIAZEPINES ON  $\text{Ca}^{2+}$  AND  $\text{K}^{+}$  CHANNELS

$\text{MgCl}_2$ , 10 mM HEPES, and 10 mM glucose, with the pH adjusted to 7.4 with Tris. Whole-cell  $\text{I}_{\text{K}}$ s were elicited at 5-s intervals by 150-ms depolarizing pulses ( $-40$  to  $+60$  mV) from a holding potential of  $-70$  mV.

Voltage-pulse protocols were performed in control solutions for more than 5 min to obtain a stable baseline. Cells were exposed to a single concentration of one of the benzodiazepines (diazepam,  $10^{-8}$  to  $10^{-3}$  M; or midazolam,  $10^{-8}$  to  $10^{-3}$  M) tested by changing the inflow perfusate of the chamber to one of a similar composition but with benzodiazepine. The perfusion chamber consisted of a glass coverslip bottom, with needles placed for rapid solution changes. The chamber volume was approximately 1 ml, and complete solution changes in the chamber could be obtained within 1 min using a peristaltic pump (CTP-3; Iuchi, Tokyo, Japan) attached to the input and output ports. After a 6-min exposure, the perfusate was switched again to the control solution. The G $\Omega$  seal was maintained for a period sufficient to evaluate the reversibility of the effects of benzodiazepine in 206 of 238 experiments (86%). In another experiment, the effects of the benzodiazepine antagonists flumazenil ( $10^{-5}$  M, a specific central type<sup>19</sup>) and PK11195 ( $10^{-5}$  M, a specific peripheral type<sup>20,21</sup>) on these channels were tested alone and with these benzodiazepine agonists.

To identify the characteristics of the  $\text{I}_{\text{Ca}}$  seen in this study, the effects of the L-type VDCC antagonist nifedipine ( $10^{-6}$  M) and the agonist Bay K 8644 ( $10^{-6}$  M) on  $\text{I}_{\text{Ca}}$  were evaluated. The effects of charybdotoxin (40 nM), a specific  $\text{Ca}^{2+}$ -activated  $\text{K}^{+}$  ( $\text{K}_{\text{Ca}}$ ) channel blocker,<sup>22</sup> and 4-aminopyridine (1 mM), a specific  $\text{Ca}^{2+}$ -independent delayed rectifier  $\text{K}^{+}$  ( $\text{K}_{\text{DR}}$ ) channel blocker,<sup>22</sup> on  $\text{I}_{\text{K}}$  were also evaluated to identify the characteristics of the  $\text{I}_{\text{K}}$ s seen in this study.

### Materials

The following drugs and chemicals were used: trypsin inhibitor (from soybean), bovine serum albumin,  $\text{Na}_2\text{ATP}$ , pyruvic acid, creatine, taurine,  $\beta$ -hydroxybutyrate, EGTA, TEACl, nifedipine, Bay K 8644, dimethyl sulfoxide, charybdotoxin, 4-aminopyridine (Sigma Chemical Co., St. Louis, MO), type-I collagenase (Gibco Laboratories, Grand Island, NY), protease (Calbiochem, La Jolla, CA), and PK11195 (Research Biochemicals, Natick, MA). Diazepam, midazolam, and flumazenil were donated by Yamanouchi Pharmaceutical Company (Tokyo, Japan). Nifedipine and Bay K 8644 were dissolved in ethanol, and diazepam was dissolved in dimethyl sulfoxide (0.01% final concentrations for both).

### Statistical Analysis

Data are expressed as the mean  $\pm$  SD. The  $\text{IC}_{50}$ s of the effects of the benzodiazepines on  $\text{I}_{\text{Ca}}$  and  $\text{I}_{\text{K}}$  were obtained using a Boltzmann expression.<sup>17,18</sup> Changes in peak whole-cell currents ( $\text{I}_{\text{Ca}}$  or  $\text{I}_{\text{K}}$ ) or in the inactivation parameters  $V_{1/2}$  and  $k$  with exposure to each drug were compared at each applied potential using the paired, two-tailed  $t$  test. The percentage of control peak whole-cell currents ( $\text{I}_{\text{Ca}}$  or  $\text{I}_{\text{K}}$ ) and the values of  $V_{1/2}$  and  $k$  after treatment were compared for the benzodiazepines using one-factor analysis of variance and a Kruskal-Wallis test. In all comparisons,  $P < 0.05$  was considered significant.

## Results

### Electric Properties of Inward $\text{Ca}^{2+}$ Currents and the Effects of Benzodiazepines on the Whole-cell $\text{Ca}^{2+}$ Currents

The  $\text{I}_{\text{Ca}}$  seen in enzymatically dispersed canine tracheal smooth muscle cells during step depolarizations from  $-70$  mV peaked at approximately 10 ms and was inactivated with a time constant of approximately 50 to 90 ms (fig. 1A: control). During baseline conditions, threshold activation of  $\text{I}_{\text{Ca}}$  occurred at approximately  $-20$  mV, and maximum peak current amplitude was obtained at approximately  $+20$  mV. In 138 cells, the maximum peak  $\text{I}_{\text{Ca}}$  was  $-318 \pm 26$  pA (range,  $-201$  to  $-612$  pA). The inactivation parameters obtained in 28 cells during control conditions were  $V_{1/2} = -20.4 \pm 2.9$  mV and  $k = 7.2 \pm 1.3$  mV. As previously reported in porcine tracheal smooth muscle cells,<sup>13,14</sup> the addition of  $10^{-6}$  M nifedipine, a blocker of slowly inactivating (L-type)  $\text{Ca}^{2+}$  channels, virtually eliminated the  $\text{I}_{\text{Ca}}$  of canine tracheal smooth muscle cells by approximately 93%, and  $10^{-6}$  M Bay K 8644, an agonist of L-type  $\text{Ca}^{2+}$  channels, enhanced the magnitude of  $\text{I}_{\text{Ca}}$  (by approximately 2.4 times) but did not alter the time course of the currents ( $n = 3$  in each case, data not shown). Inward  $\text{Ca}^{2+}$  currents with a similar time course were observed in the inactivation experiments.

As shown in a representative trace for depolarization from  $-70$  to  $+20$  mV (fig. 1A), midazolam ( $10^{-4}$  M) inhibited the magnitude of  $\text{I}_{\text{Ca}}$  but did not obviously alter the time course of the current. Peak  $\text{I}_{\text{Ca}}$  obtained with repeated steps to  $+20$  mV increased in a few minutes after obtaining the whole-cell configuration at time 0 to a stable plateau, decreased rapidly by approximately 50% during exposure to  $10^{-4}$  M midazolam and recovered completely with wash-out (fig. 1B). Similar results were obtained with diazepam.



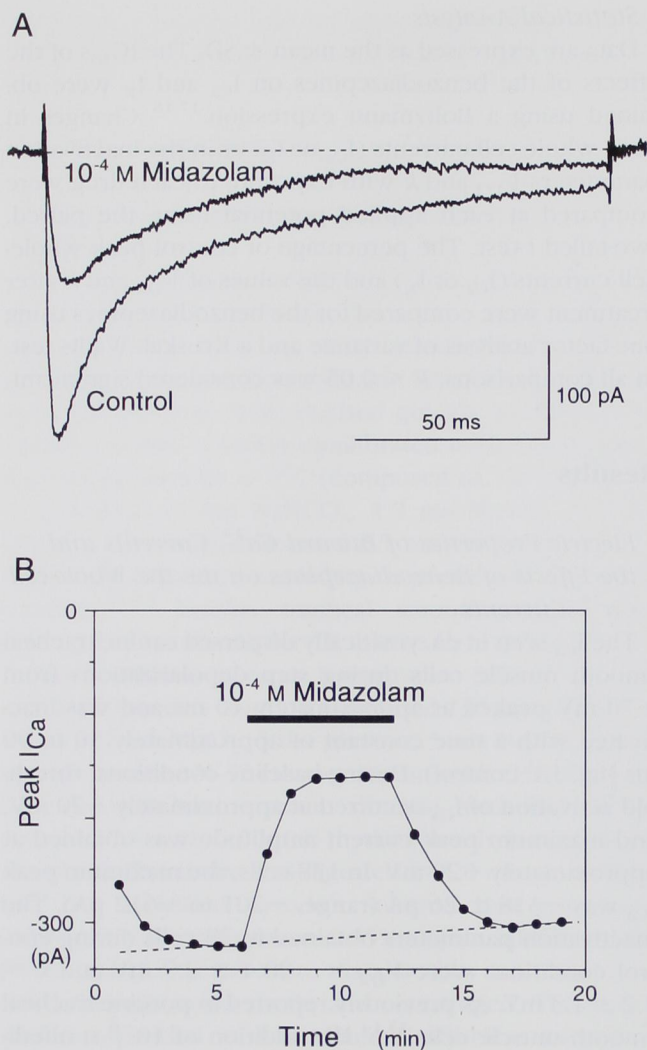

Fig. 1. The effects of midazolam on depolarization-induced whole-cell inward  $\text{Ca}^{2+}$  current. (A) Typical recordings of the whole-cell inward  $\text{Ca}^{2+}$  current induced by pulses as long as +20 mV in the absence and presence of  $10^{-4}$  M midazolam. The dashed line denotes no current. (B) Representative time course of peak  $I_{\text{Ca}}$  at +20 mV before and after exposure to  $10^{-4}$  M midazolam.

Figure 2 shows the relation between peak  $I_{\text{Ca}}$  against applied potential before and after exposure to  $10^{-6}$  M diazepam and  $10^{-5}$  M midazolam. Each of these benzodiazepines significantly inhibited  $I_{\text{Ca}}$  at step potentials ranging from of -10 to +40 mV and decreased peak  $I_{\text{Ca}}$  at +20 mV by approximately 50% ( $n = 7$ ). The actual percentage inhibitions of peak  $I_{\text{Ca}}$  achieved by these agents at these concentrations ( $50.3 \pm 8.4\%$  and  $45.8 \pm 8.8\%$ , respectively) were not significantly different. There was no apparent shift in the voltage dependence of  $I_{\text{Ca}}$  with either of the benzodiazepines.

We determined the dose dependence of the inhibition of peak  $I_{\text{Ca}}$  by each of these benzodiazepines. Figure 3 shows the relation between the percentage of control peak  $I_{\text{Ca}}$  at +20 mV and the molar concentration of the agents in the bath solution. Each of the two benzodiazepines significantly inhibited peak  $I_{\text{Ca}}$  in a dose-dependent manner. Midazolam ( $\text{IC}_{50}$  = approximately  $1.2 \times 10^{-5}$  M) required a 10-fold greater concentration to achieve the same inhibitory effect as that of diazepam ( $\text{IC}_{50}$  = approximately  $10^{-6}$  M).

Figure 4 and table 1 summarize the effects of the benzodiazepines diazepam and midazolam at equip-

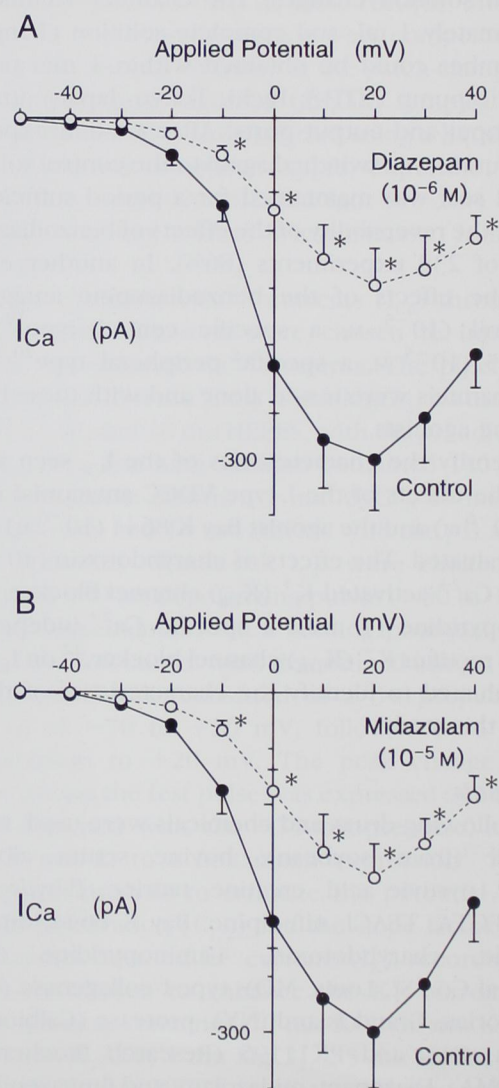

Fig. 2. The relation between the peak whole-cell inward  $\text{Ca}^{2+}$  current and applied potential before (●, solid line) and after (○, dashed line) exposure to the benzodiazepines  $10^{-6}$  M diazepam (A) and  $10^{-5}$  M midazolam (B). Symbols represent the mean  $\pm$  SD ( $n = 7$ ,  $*P < 0.05$ ).



EFFECTS OF BENZODIAZEPINES ON  $\text{Ca}^{2+}$  AND  $\text{K}^+$  CHANNELS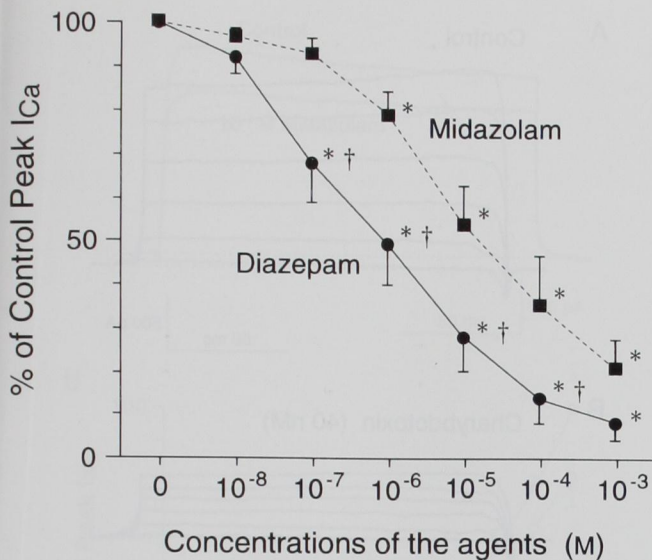

Fig. 3. The relation between peak the whole-cell inward  $\text{Ca}^{2+}$  current at +20 mV, expressed as a percentage of control, and the bath concentrations of the benzodiazepines diazepam (●, solid line) and midazolam (■, dashed line). Symbols represent the mean  $\pm$  SD ( $n = 7$ ). \* $P < 0.05$ , percentage comparison of control of peak the whole-cell inward  $\text{Ca}^{2+}$  current without the agents. † $P < 0.05$ , comparison of the values of midazolam at the same concentrations.

fective inhibitory concentrations ( $10^{-6}$  M and  $10^{-5}$  M, respectively) on the inactivation curves of  $I_{\text{Ca}}$ . Each of these agents shifted the inactivation curve to a more negative potential. The induced changes in  $V_{1/2}$  brought about by these agents were statistically significant in each case, and there was no significant difference in  $V_{1/2}$  between these agents. The slope factor  $k$  was not changed by exposure to either of the benzodiazepines.

The effects of the benzodiazepine antagonists flumazenil and PK11195 were also tested on the control  $I_{\text{Ca}}$  and on the inhibitory effect on  $I_{\text{Ca}}$  of the benzodiazepine agonists diazepam and midazolam. Flumazenil ( $10^{-5}$  M) and PK11195 ( $10^{-5}$  M) had no significant effect on the control  $I_{\text{Ca}}$  ( $n = 3$  in each case, data not shown). Figure 5 shows the time course of the peak  $I_{\text{Ca}}$  obtained in a representative cell with repeated steps to +20 mV during exposure to  $10^{-5}$  M flumazenil and  $10^{-6}$  M diazepam. Despite pretreatment with a high concentration of flumazenil,  $10^{-6}$  M diazepam still induced an approximate 50% inhibition. Similar results were obtained with  $10^{-5}$  M PK11195 and  $10^{-6}$  M diazepam, with  $10^{-5}$  M flumazenil and  $10^{-5}$  M midazolam, and with  $10^{-5}$  M PK11195 and  $10^{-5}$  M midazolam ( $n = 3$  in each case, data not shown).

### Electric Properties of Outward $\text{K}^+$ Currents and the Effects of Benzodiazepines on Them

Figure 6A shows a macroscopic outward  $\text{K}^+$  current ( $I_{\text{K}}$ ) obtained from a freshly dispersed canine tracheal smooth muscle cell dialyzed with a pipette solution containing a  $[\text{Ca}^{2+}]_i$  of  $\sim 10^{-6}$  M to enhance  $I_{\text{K}}$  through  $\text{K}_{\text{Ca}}$  channels. The  $I_{\text{K}}$  was activated progressively by 150-ms depolarizing pulses from a holding potential of -70 mV to consecutively more positive membrane potentials. Stepwise depolarization from a holding potential of -70 mV to more than -30 mV elicited an outward  $I_{\text{K}}$  with a mean peak amplitude of  $1,840 \pm 201$  pA at +60 mV ( $n = 92$ ). The addition of 40 nM charybdotoxin, a specific  $\text{K}_{\text{Ca}}$  channel blocker, significantly decreased peak  $I_{\text{K}}$  without any change in the time course of the

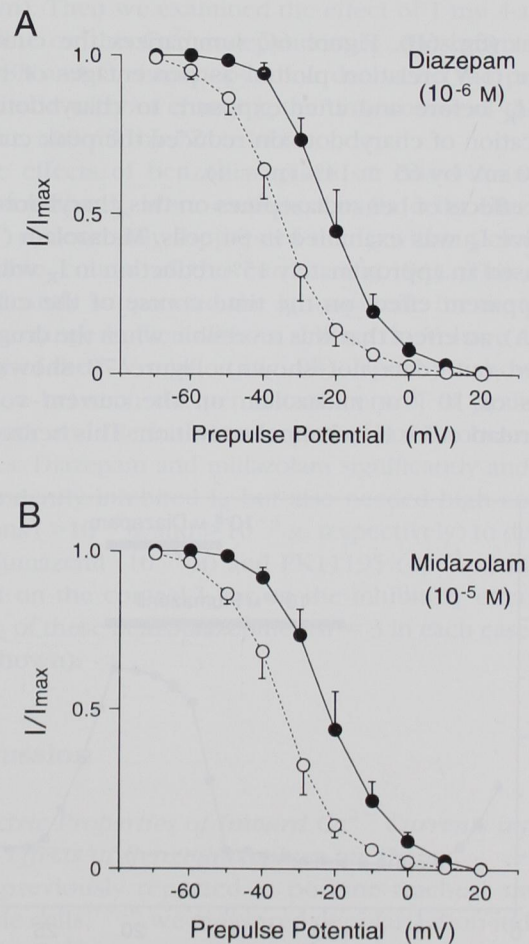

Fig. 4. The effects of the benzodiazepines diazepam (A) and midazolam (B) on voltage-dependent steady state inactivation of the whole-cell inward  $\text{Ca}^{2+}$  current. The inactivation curves were generated under control conditions (●, solid line) and then repeated in the presence of one of the benzodiazepines (○, dashed line). Symbols represent the mean  $\pm$  SD ( $n = 7$ ).



**Table 1** Effects of the Benzodiazepines Diazepam and Midazolam on the Inactivation Parameters of Whole-cell Inward  $\text{Ca}^{2+}$  Currents ( $I_{\text{Ca}}$ )

|                                                         | Diazepam<br>( $10^{-6}$ M) | Midazolam<br>( $10^{-5}$ M) |
|---------------------------------------------------------|----------------------------|-----------------------------|
| Percent inhibition of peak $I_{\text{Ca}}$<br>at +20 mV | $50.3 \pm 8.4$             | $45.8 \pm 8.8$              |
| Potential of half-inactivation<br>( $V_{1/2}$ , mV)     |                            |                             |
| Control                                                 | $-20.2 \pm 3.6$            | $-20.6 \pm 2.9$             |
| Benzodiazepine                                          | $-33.5 \pm 3.7^*$          | $-32.7 \pm 4.0^*$           |
| Slope factor (k, mV)                                    |                            |                             |
| Control                                                 | $7.1 \pm 0.7$              | $7.4 \pm 0.8$               |
| Benzodiazepine                                          | $6.7 \pm 1.0$              | $7.2 \pm 0.9$               |

Data are expressed as mean  $\pm$  SD ( $n = 7$ ). Data were obtained using a 3-s duration prepulse.

\*  $P < 0.05$ ,  $t$  test comparison to control.

current (fig. 6B). Figure 6C summarizes the current-voltage (I-V) relation plotted as percentages of maximum  $I_{\text{K}}$  before and after exposure to charybdotoxin. Application of charybdotoxin reduced the peak current at +60 mV by  $65 \pm 14\%$  ( $n = 4$ ).

The effects of benzodiazepines on this charybdotoxin-sensitive  $I_{\text{K}}$  was examined in 84 cells. Midazolam ( $10^{-4}$  M) caused an approximately 15% reduction in  $I_{\text{K}}$  without any apparent effect on the time course of the current (fig. 7A), an effect that was reversible when the drug was washed out (data not shown). Figure 7B shows the effects of  $10^{-4}$  M midazolam on the current-voltage (I-V) relation for  $\text{K}^+$  channel activation. This benzodiaz-

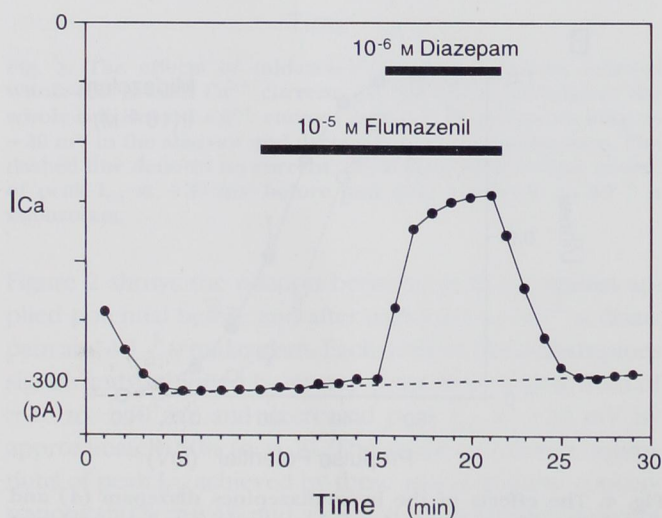

**Fig. 5.** A representative time course of the peak whole-cell inward  $\text{Ca}^{2+}$  current obtained with repeated steps to +10 mV during sequential additions of  $10^{-5}$  M flumazenil and  $10^{-6}$  M diazepam.

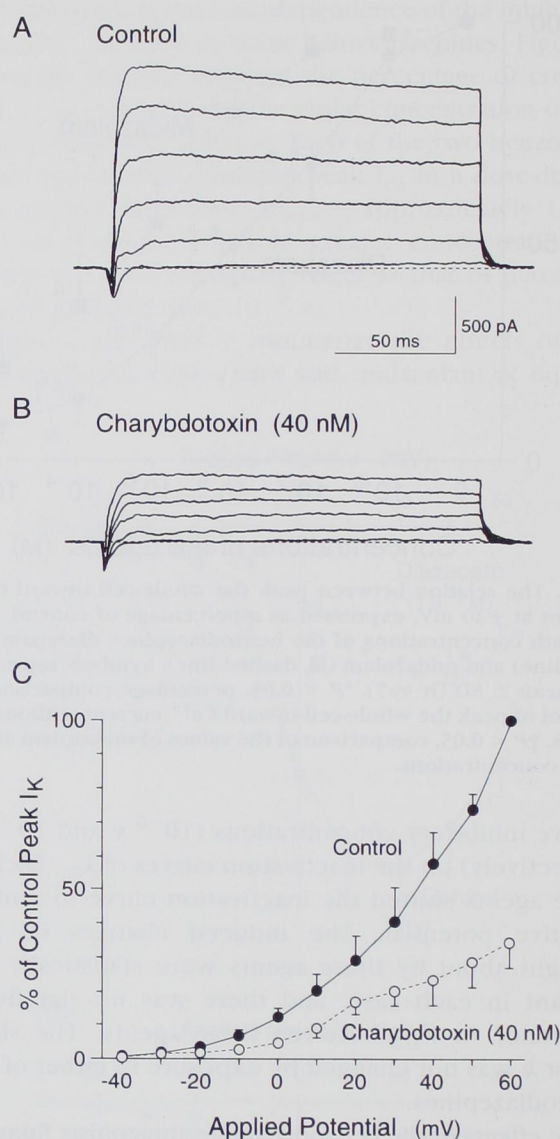

**Fig. 6.** The whole-cell outward  $\text{K}^+$  current in a canine tracheal smooth muscle cell dialyzed with 1.8 mM  $\text{CaCl}_2$  and 2.5 mM EGTA before (A) and after (B) exposure to 40 nM charybdotoxin. The whole-cell outward  $\text{K}^+$  currents were generated by depolarizing pulses to -40, -20, 0, +20, +40, and +60 mV from a holding potential of -70 mV. (C) Relative peak current-voltage relations obtained before and after exposure to 40 nM charybdotoxin. Symbols represent the mean  $\pm$  SD ( $n = 4$ ).

epine significantly suppressed the  $I_{\text{K}}$  amplitude over the entire voltage range studied without shifting the voltage dependency of the I-V relation. Figure 7C shows the relation between peak  $I_{\text{K}}$  at +60 mV, expressed as a percentage control, and the bath concentrations of the benzodiazepines. Both the benzodiazepines diazepam and midazolam significantly and dose dependently inhibited  $I_{\text{K}}$  but required high concentrations of more than



EFFECTS OF BENZODIAZEPINES ON  $\text{Ca}^{2+}$  AND  $\text{K}^+$  CHANNELS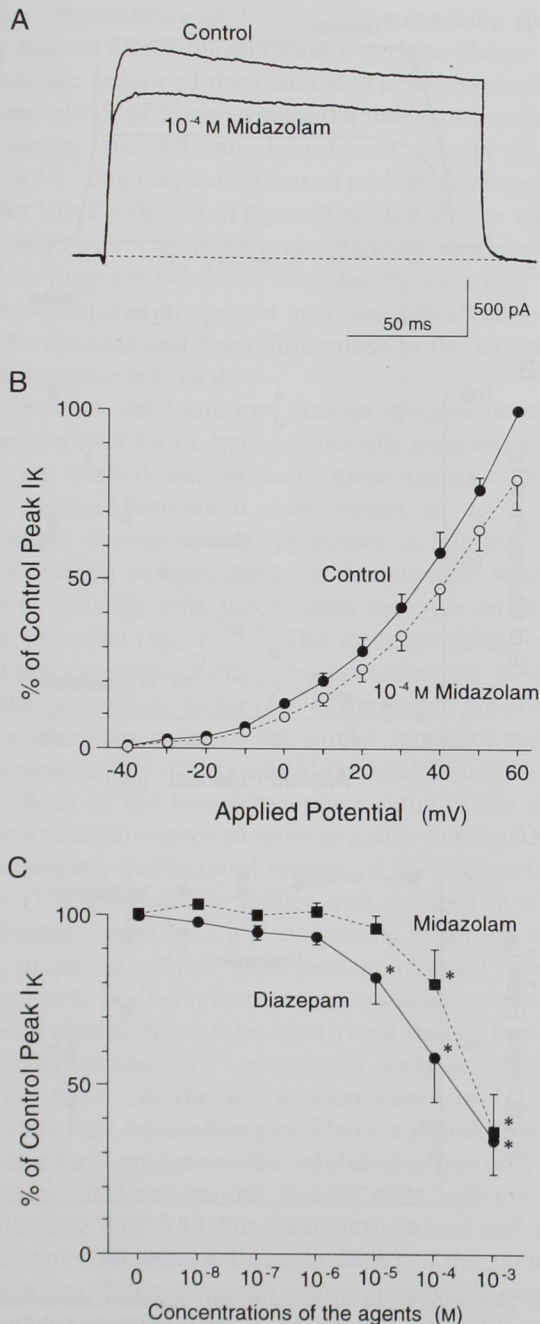

Fig. 7. The effects of midazolam on depolarization-induced whole-cell outward  $\text{K}^+$  currents ( $\text{I}_K$ ) with a pipette solution including 1.8 mM  $\text{CaCl}_2$  and 2.5 mM EGTA. (A) Typical recordings of  $\text{I}_K$  induced by pulses up to +60 mV in the absence and presence of  $10^{-4}$  M midazolam. The dashed line denotes no current. (B) Relative peak current-voltage relations obtained before and after exposure to  $10^{-4}$  M midazolam. (C) The relation between peak  $\text{I}_K$  at +60 mV, expressed as a percentage of control, and the bath concentrations of the benzodiazepines diazepam (●, solid line) and midazolam (■, dashed line). Symbols represent the mean  $\pm$  SD ( $n = 7$ ). \* $P < 0.05$ , percentage comparison of control of peak  $\text{I}_K$  without agents.

$10^{-5}$  M and more than  $10^{-4}$  M, respectively, to show significant effects. Flumazenil ( $10^{-5}$  M) and PK11195 ( $10^{-5}$  M) had no effect on the control  $\text{I}_K$  or on the inhibitory effect on the  $\text{I}_K$  of these benzodiazepines ( $n = 3$  in each case, data not shown).

In a separate series of experiments, we used a pipette solution in which  $[\text{Ca}^{2+}]_i$  was strongly buffered with 10 mM EGTA to minimize the outward  $\text{I}_K$  through  $\text{K}_{\text{Ca}}$  channels, and we examined the effects of benzodiazepines on  $\text{Ca}^{2+}$ -independent  $\text{I}_K$ . Figure 8A shows a representative trace of  $\text{I}_K$  under these conditions. The  $\text{I}_K$ s were activated progressively by 150-ms depolarizing pulses from a holding potential of -70 mV to consecutively more positive potentials. The mean peak amplitude in 92 cells was  $518 \pm 110$  pA at +60 mV. The application of 40 nM charybdotoxin had no effect on the  $\text{I}_K$  ( $n = 3$ , data not shown). Then we examined the effect of 1 mM 4-aminopyridine on this  $\text{Ca}^{2+}$ -independent  $\text{I}_K$ . As shown in figures 8B and C, 4-aminopyridine decreased the peak  $\text{I}_K$  amplitude without changing the time course of the current at +60 mV by  $72 \pm 14\%$ .

The effects of benzodiazepines on this 4-aminopyridine-sensitive  $\text{I}_K$  were examined in 84 cells. Diazepam ( $10^{-4}$  M) reversibly suppressed the  $\text{I}_K$  without changing the time course of the current (fig. 9A). This agent significantly suppressed the  $\text{I}_K$  amplitude for the entire voltage range studied without shifting the voltage dependency of the I-V relation (fig. 9B). Figure 9C shows the relation between the percentage control of peak  $\text{I}_K$  at +60 mV and the bath concentrations of the benzodiazepines. Diazepam and midazolam significantly and dose dependently inhibited  $\text{I}_K$  but also needed high concentrations ( $>10^{-5}$  M and  $>10^{-4}$  M, respectively) to depress  $\text{I}_K$ . Flumazenil ( $10^{-5}$  M) and PK11195 ( $10^{-5}$  M) had no effect on the control  $\text{I}_K$  or on the inhibitory effects on the  $\text{I}_K$  of these benzodiazepines ( $n = 3$  in each case, data not shown).

## Discussion

### Electric Properties of Inward $\text{Ca}^{2+}$ Currents and the Effects of Benzodiazepines on Them

As previously reported in porcine tracheal smooth muscle cells,<sup>13,14</sup> we measured depolarization-induced inward  $\text{Ca}^{2+}$  currents ( $\text{I}_{\text{Ca}}$ ) in freshly dispersed canine tracheal smooth muscle cells under ionic conditions designed to inhibit  $\text{K}^+$  and  $\text{Na}^+$  currents and to enhance  $\text{Ca}^{2+}$  currents. Based on their time and voltage dependencies, their sensitivity to a nifedipine block-



### Interactions between Benzodiazepine Agonists and Antagonists on Whole-cell Inward $\text{Ca}^{2+}$ and Outward $\text{K}^{+}$ Currents

Airway smooth muscle tone also could be regulated by some neuropeptides.<sup>37</sup>  $\gamma$ -Aminobutyric acid (GABA) has an inhibitory effect on postganglionic cholinergic neurotransmission in ferret airways.<sup>38</sup> The benzodiazepine receptor is a positive modulatory subunit of the GABA receptor and enhances the chloride channel currents by increasing its opening frequency.<sup>39</sup> Therefore, in addition to directly inhibiting VDCCs, benzodiazepines might inhibit airway smooth muscle contraction by stimulating some benzodiazepine receptor, which leads to GABA receptor activation. In the current study, however,  $10^{-5}$  M flumazenil and  $10^{-5}$  M PK11195 (specific central<sup>19</sup> and specific peripheral<sup>20,21</sup> benzodiazepine antagonists, respectively) had no effect on the control  $I_{\text{Ca}}$  and  $I_{\text{K}}$  or on the changes in  $I_{\text{Ca}}$  and  $I_{\text{K}}$  induced by the benzodiazepine agonists (fig. 5). Therefore, the diazepam and midazolam benzodiazepines probably relax the airway smooth muscle by binding cell membranes relating to VDCCs, rather than by activating benzodiazepine receptors. In support of our findings, studies have shown that flumazenil and PK11195 have no effect on benzodiazepine-induced relaxation of airway smooth muscle.<sup>1,2,7</sup> The concentration of flumazenil ( $10^{-5}$  M) used in this study is greater than the estimated levels of plasma concentrations used clinically.<sup>20,40,41</sup>

### Concentration Dependence and Clinical Relevance

The benzodiazepines tested showed dose-dependent inhibition of  $I_{\text{Ca}}$  and  $I_{\text{K}}$  (figs. 3, 7, and 9). Diazepam is more potent than midazolam in terms of  $I_{\text{Ca}}$  and  $I_{\text{K}}$ . Our data should be extrapolated to the clinical situation cautiously because of possible species differences, *in vivo* and *in vitro* differences, and the fact that our patch-clamp experiments were performed at low, nonphysiologic (ambient) temperature and using intracellular (pipette) and extracellular (organ bath) electrolytes. Nonetheless, the plasma concentrations of the benzodiazepines used clinically are approximately  $3 \times 10^{-7}$  to  $10^{-5}$  M.<sup>42-44</sup> In the current study, the bath concentrations of the benzodiazepines diazepam and midazolam used to induce 50% inhibition of  $I_{\text{Ca}}$  were approximately  $10^{-6}$  M and  $10^{-5}$  M, respectively, which seems relevant to clinical concentrations. We must note, however, that these agents are highly bound to plasma protein (> 90% bound),<sup>42</sup> and the estimated plasma concentrations of free agents seem to be approximately  $10^{-9}$  to  $10^{-6}$  M. Therefore, the similarity between the clinical concentra-

tions<sup>42-44</sup> and the concentrations needed to inhibit  $I_{\text{Ca}}$  by approximately 50% in this study simply may be a coincidence. Other mechanisms, such that benzodiazepines acts on the medulla to cause airway dilatation,<sup>45</sup> also should be considered.

In conclusion, the benzodiazepines diazepam and midazolam decreased the inward  $\text{Ca}^{2+}$  current of canine tracheal smooth muscle cells, indicating the inhibition of VDCCs. This response could contribute to the ability of these agents to relax airway smooth muscle *in vitro*. A shift in the inactivation curve by these agents to more negative potentials can be interpreted as evidence of drug-induced stabilization of the inactivated state. Because the benzodiazepines reduced the  $\text{K}^{+}$  channel activity at high concentrations,  $\text{K}^{+}$  channel opening could not be responsible for the mechanisms of benzodiazepine-induced bronchodilation. The lack of antagonized effects of their antagonists flumazenil and PK11195 is related to the non-GABA-mediated electrophysiologic effects of benzodiazepines on airway smooth muscle contractility.

## References

1. Raeburn D, Miller LG, Summer WR: Peripheral type benzodiazepine receptor and airway smooth muscle relaxation. *J Pharmacol Exp Ther* 1988; 245:557-62
2. Koga Y, Sato S, Sodeyama N, Takahashi M, Kato M, Iwatsuki N, Hashimoto Y: Comparison of the relaxant effects of diazepam, flunitrazepam and midazolam on airway smooth muscle. *Br J Anaesth* 1992; 69:65-9
3. French JF, Rapoport RM, Matlib MA: Possible mechanism of benzodiazepine-induced relaxation of vascular smooth muscle. *J Cardiovasc Pharmacol* 1989; 14:405-11
4. Chang KSK, Feng MG, Davis RF: Midazolam produces vasodilation by mixed endothelium-dependent and -independent mechanisms. *Anesth Analg* 1994; 78:710-7
5. Somlyo AP, Himpens B: Cell calcium and its regulation in smooth muscle. *FASEB J* 1989; 3:2266-76
6. van Breemen C, Saida K: Cellular mechanisms regulating  $[\text{Ca}^{2+}]_i$  smooth muscle. *Annu Rev Physiol* 1989; 51:315-29
7. Yoshimura H, Kai T, Nishimura J, Kobayashi S, Takahashi S, Kanaide H: Effects of midazolam on intracellular  $\text{Ca}^{2+}$  and tension in airway smooth muscles. *ANESTHESIOLOGY* 1995; 83:1009-20
8. Bourrean J-P, Abela AP, Kwan CY, Daniel EE: Acetylcholine  $\text{Ca}^{2+}$  stores refilling directly involves a dihydropyridine-sensitive channel in dog trachea. *Am J Physiol* 1991; 261:C497-505
9. Ozaki H, Kwon S-C, Tajimi M, Karaki H: Changes in cytosolic  $\text{Ca}^{2+}$  and contraction induced various stimulants and relaxants in canine tracheal smooth muscle. *Pflügers Arch* 1990; 416:351-9
10. Allen SL, Boyle JP, Cortijo J, Foster RW, Morgan GP, Small RC: Electrical and mechanical effects of BRL34915 in guinea-pig isolated trachealis. *Br J Pharmacol* 1986; 89:395-405
11. Tomita T: Electrical properties of airway smooth muscle, Airway



EFFECTS OF BENZODIAZEPINES ON  $\text{Ca}^{2+}$  AND  $\text{K}^{+}$  CHANNELS

Smooth Muscle in Health and Disease. Edited by Coburn RF. New York, Plenum, 1989, pp 151-67

12. Yamakage M, Hirshman CA, Croxton TL: Sodium nitroprusside stimulates  $\text{Ca}^{2+}$ -activated  $\text{K}^{+}$  channels in porcine tracheal smooth muscle cells. *Am J Physiol* 1996; 270:L338-45

13. Yamakage M, Hirshman CA, Croxton TL: Volatile anesthetics inhibit voltage-dependent  $\text{Ca}^{2+}$  channels in porcine tracheal smooth muscle cells. *Am J Physiol* 1995; 268:L187-91

14. Yamakage M, Hirshman CA, Croxton TL: Inhibitory effects of thiopental, ketamine, and propofol on voltage-dependent  $\text{Ca}^{2+}$  channels in porcine tracheal smooth muscle cells. *ANESTHESIOLOGY* 1995; 83:1274-82

15. Isenberger G, Klockner U: Calcium tolerant ventricular myocytes prepared by preincubation in a "KB medium." *Pflügers Arch* 1982; 395:6-18

16. Hamill OP, Marty A, Neher E, Sakmann B, Sigworth FJ: Improved patch-clamp techniques for high-resolution current recording from cells and cell-free membrane patches. *Pflügers Arch* 1981; 391:85-100

17. Langton PD, Burke EP, Sanders KM: Participation of Ca currents in colonic electrical activity. *Am J Physiol* 1989; 257:C451-60

18. Hodgkin LA, Huxley AF: A quantitative description of membrane current and its application to conduction and excitation in nerve. *J Physiol (Lond)* 1952; 117:500-44

19. Ricou B, Forster A, Bruckner A, Chastonay P, Gemperle M: Clinical evaluation of a specific benzodiazepine antagonist (Ro15-1788). *Br J Anaesth* 1986; 58:1005-11

20. LeFur G, Vaucher N, Perrier ML, Flamier A, Benavides J, Renault C, Dubroeuq MC, Gueremy C, Uzan A: Differentiation between two ligands for peripheral benzodiazepine binding sites, [ $^3\text{H}$ ]RO5-4864 and [ $^3\text{H}$ ]PK11195, by thermodynamic studies. *Life Sci* 1983; 33:449-57

21. Mestre M, Carriot T, Belin C, Uzan A, Renault C, Dubroeuq MC, Gueremy C, LeFur G: Electrophysiological and pharmacological evidence that peripheral type benzodiazepine receptors are coupled to Ca channels in the heart. *Life Sci* 1985; 36:391-400

22. Boyle JP, Tomasic M, Kotlikoff MI: Delayed rectifier potassium channels in canine and porcine airway smooth muscle cells. *J Physiol (Lond)* 1992; 447:329-50

23. Marthan R, Cécile M, Amédée T, Mironneau J: Calcium channel currents in isolated smooth muscle cells from human bronchus. *J Appl Physiol* 1989; 66:1706-14

24. Green KA, Small RC, Foster RW: The properties of voltage-operated  $\text{Ca}^{2+}$ -channels in bovine isolated trachealis cells. *Pulm Pharmacol* 1993; 6:49-62

25. Cheng EY, Mazzeo AJ, Bosnjak ZJ, Coon RL, Kampine JP: Direct relaxant effects of intravenous anesthetics on airway smooth muscle. *Anesth Analg* 1996; 83:162-8

26. Yamakage M, Hirshman CA, Namiki A, Croxton TL: Inhibition of voltage-dependent  $\text{Ca}^{2+}$  channels of porcine tracheal smooth muscle by the novel  $\text{Ca}^{2+}$  channel antagonist RWJ-22108. *Gen Pharmacol* 1997; 28:689-94

27. Ward SM, Sanders KM: Upstroke component of electrical slow waves in canine colonic smooth muscle due to nifedipine-resistant calcium current. *J Physiol (Lond)* 1992; 455:321-37

28. Bean B: Nitrendipine block of cardiac calcium channels: High-affinity binding to the inactivated state. *Proc Natl Acad Sci U S A* 1984; 81:6388-92

29. Ito Y, Tajima K: Spontaneous activity in the trachea of dogs treated with indomethacin: An experimental model for aspirin-related asthma. *Br J Pharmacol* 1981; 73:563-71

30. Kotlikoff MI: Potassium currents in canine airway smooth muscle cells. *Am J Physiol* 1990; 259:L384-95

31. McCann JD, Welsh MJ: Calcium-activated potassium channels in canine airway smooth muscle. *J Physiol (Lond)* 1986; 372:113-27

32. Kotlikoff MI: Potassium channels in airway smooth muscle: A tale of two channels. *Pharmacol Ther* 1993; 58:1-12

33. Langton PD, Nelson MT, Huang Y, Standen NB: Block of  $\text{Ca}^{2+}$ -activated  $\text{K}^{+}$  channels in mammalian arterial myocytes by tetraethylammonium ions. *Am J Physiol* 1991; 260:H927-34

34. Beech DJ, Bolton TB: Two components of potassium current activated by depolarization of single smooth muscle cells from the rabbit portal vein. *J Physiol (Lond)* 1989; 418:293-309

35. Eskinder H, Gebremedhin D, Lee JG, Rusch NJ, Supan FD, Kampine JP, Bosnjak ZJ: Halothane and isoflurane decrease the open state probability of  $\text{K}^{+}$  channels in dog cerebral arterial muscle cells. *ANESTHESIOLOGY* 1995; 82:479-90

36. Bonnet P, Rusch NJ, Harder DR: Characterization of an outward  $\text{K}^{+}$  current in freshly dispersed cerebral arterial muscle cells. *Pflügers Arch* 1991; 413:292-6

37. Barnes PJ: Modulation of neurotransmission in airways. *Physiol Rev* 1992; 72:699-729

38. Tamaoki J, Graf PD, Nadel JA: Effect of gamma-aminobutyric acid on neurally mediated contraction of guinea pig trachealis smooth muscle. *J Pharmacol Exp Ther* 1987; 243:86-90

39. DeLorey TM, Kissin I, Brown P, Brown GB: Barbiturate-benzodiazepine interaction at the  $\gamma$ -aminobutyric acid<sub>A</sub> receptor in rat cerebral cortical synaptoneurosome. *Anesth Analg* 1993; 77:598-605

40. Amrein R, Hetzel W: Pharmacology of Dormicum® (midazolam) and Anexate® (flumazenil). *Acta Anaesthesiol Scand* 1990; 34(suppl 92):6-15

41. Brogden RN, Goa KL: Flumazenil: A preliminary review of its benzodiazepine antagonist properties, intrinsic activity and therapeutic use. *Drugs* 1988; 35:448-67

42. Zbinden G, Randall LO: Pharmacology of benzodiazepines: Laboratory and clinical correlations. *Adv Pharmacol* 1967; 5:213-91

43. Dundee JW: New IV anesthetics. *Br J Anaesth* 1979; 51:641-8

44. Allonen H, Ziegler G, Klotz U: Midazolam kinetics. *Clin Pharmacol Ther* 1981; 30:653-61

45. Haxhiu MA, van Lunteren E, Cherniack NS, Deal EC: Benzodiazepines acting on ventral surface of medulla cause airway dilation. *Am J Physiol* 1989; 257:R810-5
